# Supplementary material for: Foot Plantar Pressure Measurement System Using Highly Sensitive Crack-Based Sensor
Source: PubMed Central journal article supplement (PMC6960515; doi:10.3390/s19245504), 2019-12-13
Supplement: sensors-19-05504-s001.pdf [file sensors-19-05504-s001.pdf]

Supplementary Materials

# Foot Plantar Pressure Measurement System Using Highly Sensitive Crack-Based Sensor

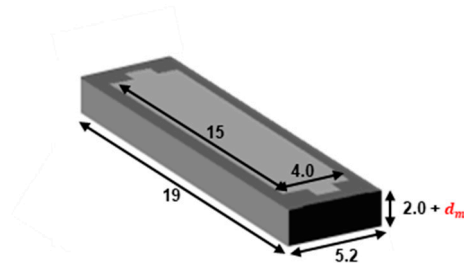

**Figure S1.** Specific dimension of the frame exterior and the stainless steel.

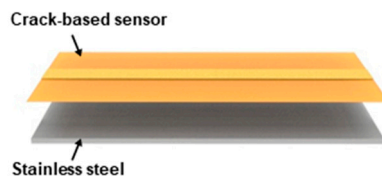

**Figure S2.** Schematic illustration of the crack-based sensor and stainless steel attachment.

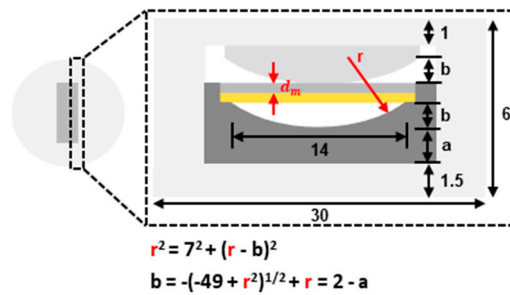

**Figure S3.** Cross-sectional image of the sensor and specific dimensions of the elastomer and inside the frame.

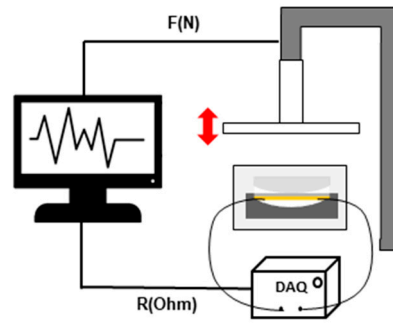

Figure S4. Schematic illustration of the experimental setup.

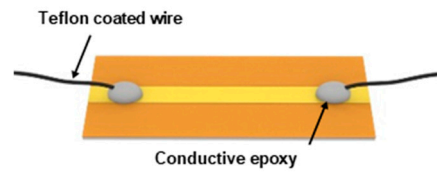

Figure S5. Schematic illustration of wire-connected crack-based sensor.

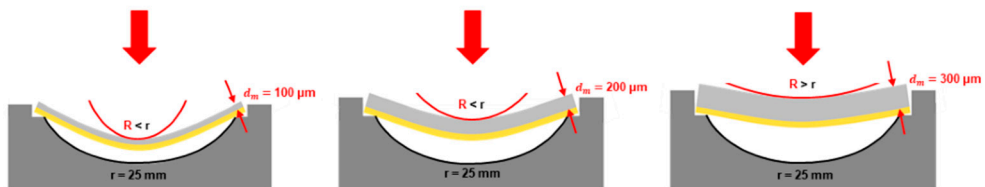

Figure S6. Curvature radius difference due to stiffness difference.

**Table S1.** Material properties of stainless steel, crack-based sensor (PI film).

|                              | <b>Young's modulus</b> | <b>Thickness</b>          |
|------------------------------|------------------------|---------------------------|
| Stainless steel 304          | 200 GPa ( $Y_m$ )      | $d_m$                     |
| Crack-based sensor (PI film) | 2.5 GPa ( $Y_f$ )      | 8 $\mu\text{m}$ ( $d_f$ ) |
